# Supplementary material for: Effects of environment, dietary regime and ageing on the dengue vector microbiota: evidence of a core microbiota throughout Aedes aegypti lifespan
Source: PubMed Central journal article supplement (PMC5027870; doi:10.1590/0074-02760160238), 2016-08-25
Supplement: 0074-0276-mioc-0074-02760160238-suppl01.pdf [file 0074-0276-mioc-0074-02760160238-suppl01.pdf]

SUPPLEMENTARY TABLE  
*Aedes aegypti* microbiota composition (number of reads) per sample

| Phyla          | Class               | Order             | Family             | Genus                   | SFY_1 | SFY_2 | SFY_3 | SFY_4 | BFY_1 | BFY_2 | SFO_1 | SFO_2 | SFO_3 | SFO_4 | Two-<br>DAR_1 | Two-<br>DAR_2 | Four-<br>DAR_1 | Four-<br>DAR_2 | Six-<br>DAR_1 | Six-<br>DAR_2 | Seven-<br>DAR | Eight-<br>DAR | WD_1 | WD_2 | WD_3 | WD_4 |
|----------------|---------------------|-------------------|--------------------|-------------------------|-------|-------|-------|-------|-------|-------|-------|-------|-------|-------|---------------|---------------|----------------|----------------|---------------|---------------|---------------|---------------|------|------|------|------|
| Bacteroidetes  | Flavobacteria       | Flavobacteriales  | Flavobacteriaceae  | <i>Elizabethkingia</i>  | 0     | 788   | 13    | 2631  | 0     | 0     | 1174  | 1560  | 1423  | 701   | 0             | 0             | 0              | 0              | 0             | 0             | 7             | 4             | 0    | 0    | 0    | 0    |
| Proteobacteria | Alphaproteobacteria | Rhodospirillales  | Acetobacteraceae   | <i>Asaia</i>            | 0     | 0     | 0     | 0     | 0     | 0     | 2     | 941   | 10    | 39    | 0             | 0             | 0              | 87             | 0             | 0             | 0             | 5             | 0    | 0    | 0    | 0    |
| Proteobacteria | Betaproteobacteria  | Burkholderiales   | Comamonadaceae     | *                       | 112   | 162   | 162   | 43    | 109   | 228   | 64    | 58    | 60    | 96    | 129           | 171           | 133            | 194            | 128           | 193           | 162           | 329           | 123  | 111  | 150  | 152  |
| Proteobacteria | Betaproteobacteria  | Burkholderiales   | Oxalobacteraceae   | *                       | 728   | 587   | 914   | 358   | 766   | 763   | 402   | 160   | 474   | 564   | 853           | 1006          | 786            | 679            | 803           | 965           | 878           | 913           | 1114 | 812  | 1061 | 897  |
| Proteobacteria | Gammaproteobacteria | Aeromonadales     | Aeromonadaceae     | <i>Aeromonas</i>        | 87    | 105   | 54    | 28    | 95    | 154   | 40    | 7     | 27    | 44    | 53            | 96            | 92             | 112            | 66            | 116           | 66            | 122           | 72   | 55   | 57   | 63   |
| Proteobacteria | Gammaproteobacteria | Enterobacteriales | Enterobacteriaceae | *                       | 67    | 35    | 60    | 19    | 36    | 34    | 745   | 1124  | 912   | 166   | 675           | 61            | 26             | 22             | 47            | 41            | 34            | 88            | 53   | 24   | 45   | 58   |
| Proteobacteria | Gammaproteobacteria | Pseudomonadales   | Pseudomonadaceae   | <i>Pseudomonas</i>      | 3289  | 2524  | 3148  | 1434  | 3260  | 2869  | 1980  | 646   | 1639  | 2777  | 2598          | 3034          | 3215           | 3007           | 3126          | 2963          | 3130          | 2664          | 3114 | 3386 | 3050 | 3185 |
| Proteobacteria | Gammaproteobacteria | Pseudomonadales   | Moraxellaceae      | <i>Acinetobacter</i>    | 156   | 217   | 119   | 51    | 178   | 309   | 109   | 55    | 17    | 115   | 105           | 148           | 173            | 251            | 121           | 182           | 155           | 250           | 67   | 118  | 146  | 148  |
| Proteobacteria | Gammaproteobacteria | Pseudomonadales   | Pseudomonadaceae   | *                       | 19    | 9     | 4     | 1     | 15    | 18    | 8     | 4     | 2     | 4     | 137           | 8             | 8              | 21             | 209           | 8             | 18            | 16            | 5    | 4    | 2    | 4    |
| Proteobacteria | Gammaproteobacteria | Xanthomonadales   | Xanthomonadaceae   | <i>Stenotrophomonas</i> | 68    | 51    | 46    | 14    | 85    | 88    | 39    | 18    | 4     | 21    | 2             | 10            | 68             | 71             | 14            | 13            | 74            | 85            | 2    | 18   | 16   | 24   |
| Other          | Other               | Other             | Other              | Other                   | 73    | 121   | 79    | 20    | 55    | 136   | 36    | 26    | 31    | 72    | 47            | 65            | 98             | 155            | 85            | 118           | 75            | 123           | 49   | 71   | 72   | 68   |

SFY: sugar-fed young; BFY: blood-fed young; SFO: sugar-fed old; DAR: days after release in the mark-release-recapture experiment; WD: wild; Taxa with < 2% relative abundance were pooled as "Other"; \*: not discriminated at genus level.
